# Supplementary material for: A novel bimetallic cage complex constructed from six V4Co pentatomic rings: hydrothermal synthesis and crystal structure of [(2,2′-Py2NH)2Co]3V8O23
Source: Royal Society of Chemistry journal article supplement (doi:10.1039/b104273b), 2001-01-01
Supplement: b104273b.pdf [file b104273b.pdf]

## Supplementary information

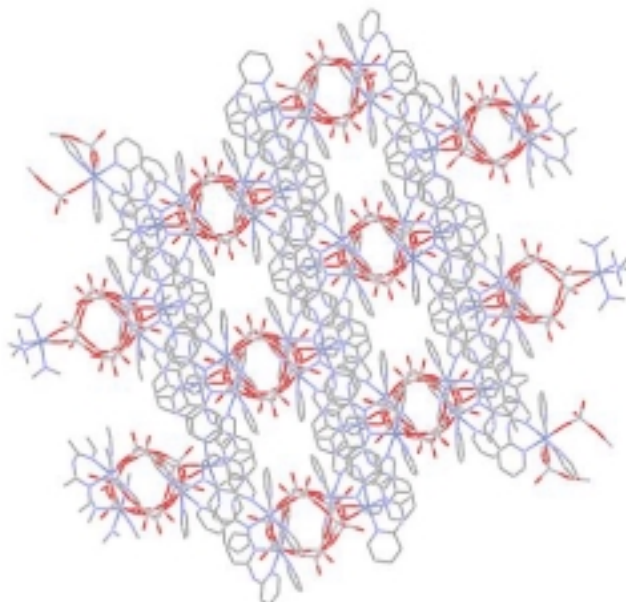

Fig. S1. Another view of the packing of cage **1** in three-dimensional space.
